# Supplementary material for: Assessing the Efficiency of Health-care Facilities in Sub-Saharan Africa: A Systematic Review
Source: PubMed Central journal article supplement — Health Serv Res Manag Epidemiol. 2020 Apr 24;7:2333392820919604. doi: 10.1177/2333392820919604 (PMC7218466; doi:10.1177/2333392820919604), 2020-04-24
Supplement: Standardized_validity_evaluation_tool.pdf [file Standardized_validity_evaluation_tool.pdf]

Standardized validity evaluation tool

|                                                                                                    |     |
|----------------------------------------------------------------------------------------------------|-----|
| Design:                                                                                            |     |
| 1. Was the study observational (cross-sectional)?                                                  | Y/N |
| 2. Was the study period defined?                                                                   | Y/N |
| Sample:                                                                                            |     |
| 1. Was the sample size justified?                                                                  | Y/N |
| 2. Was the sample drawn from more than one site?                                                   | Y/N |
| 3. Did the study include the entire hospital?                                                      | Y/N |
| 4. Did the study include more than one type of hospital (public, private, teaching, non-teaching)? | Y/N |
| Indicators                                                                                         |     |
| 1. Were the indicators reliable and valid?                                                         | Y/N |
| 2. Were different indicators used to measure the impact on productivity?                           | Y/N |
| 3. Were explicit numbers given for all indicators?                                                 | Y/N |
| 4. Were several inputs and several outputs measured?                                               | Y/N |
| 5. Were different types of hospital staff members assessed?                                        | Y/N |
| Statistical analysis:                                                                              |     |
| 1. Were multiple statistical methods used?                                                         | Y/N |
| 2. Was the statistical method justified?                                                           | Y/N |
